# Supplementary material for: Assembly of CdSe nanoparticles into microspheres by a liquid droplet emulsion process
Source: Royal Society of Chemistry journal article supplement (doi:10.1039/b805549a), 2008-01-01
Supplement: b805549a.pdf [file b805549a.pdf]

## Assembly of CdSe Nanoparticles into Microspheres by a Liquid Droplet Emulsion Process†

Roger G. Harrison,\* Adam L. Washburn, Ammon T. Pickett, Dawn M. Call

Department of Chemistry and Biochemistry, Brigham Young University, Provo, Utah 84602, USA. Email: [roger\\_harrison@byu.edu](mailto:roger_harrison@byu.edu); Fax: +1 801-422-0153; Tel: +1 801-422-8096

### Supplementary Information

Figures of precipitated nanoparticles without stirring, more pictures of spheres formed by adding methanol to hexane and hexane to methanol while stirring, and solids from solvents other than hexane (Figures 1-4). Optical and fluorescent images of spheres (Figure 5). Tables of nanoparticle sizes as a function of stir rate and concentration (Tables 1 and 2).

**SI Figure 1.** Solid formed by precipitating nanoparticles from hexane by methanol without stirring.

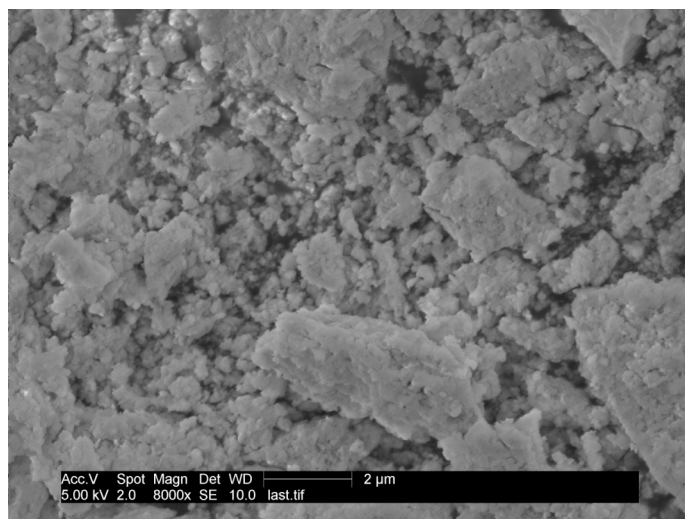

**SI Figure 2.** Spheres formed by adding methanol to a stirred hexane solution of nanoparticles.

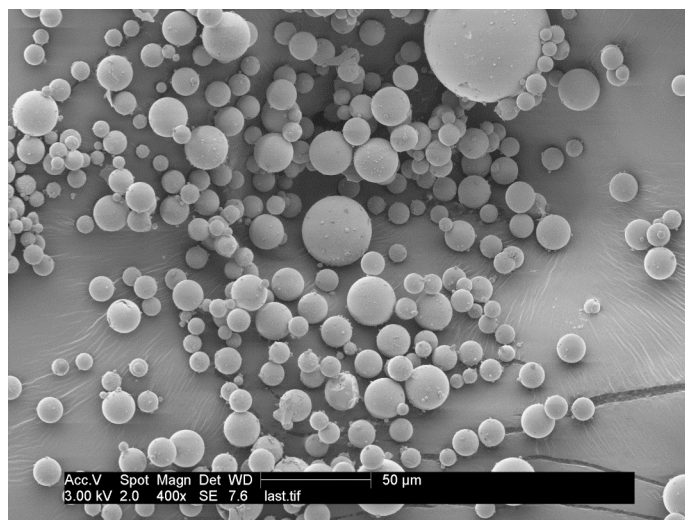

**SI Figure 3.** Spheres formed by adding hexane solutions of nanoparticles to stirred methanol.

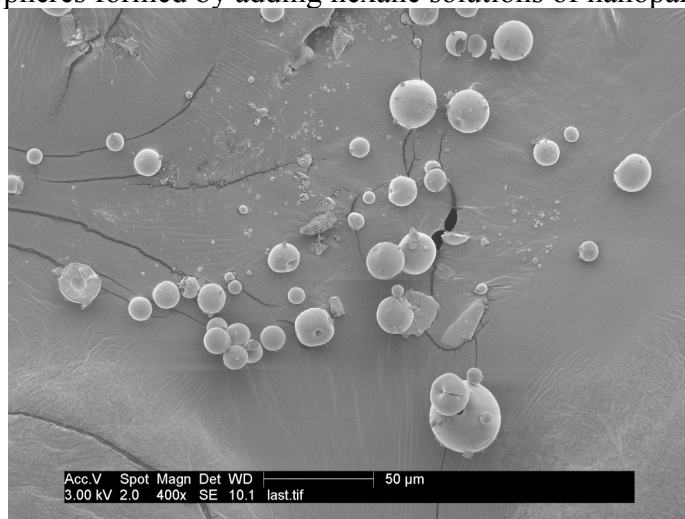

**SI Figure 4.** Solids formed by precipitating nanoparticles from chloroform (top) and toluene (bottom).

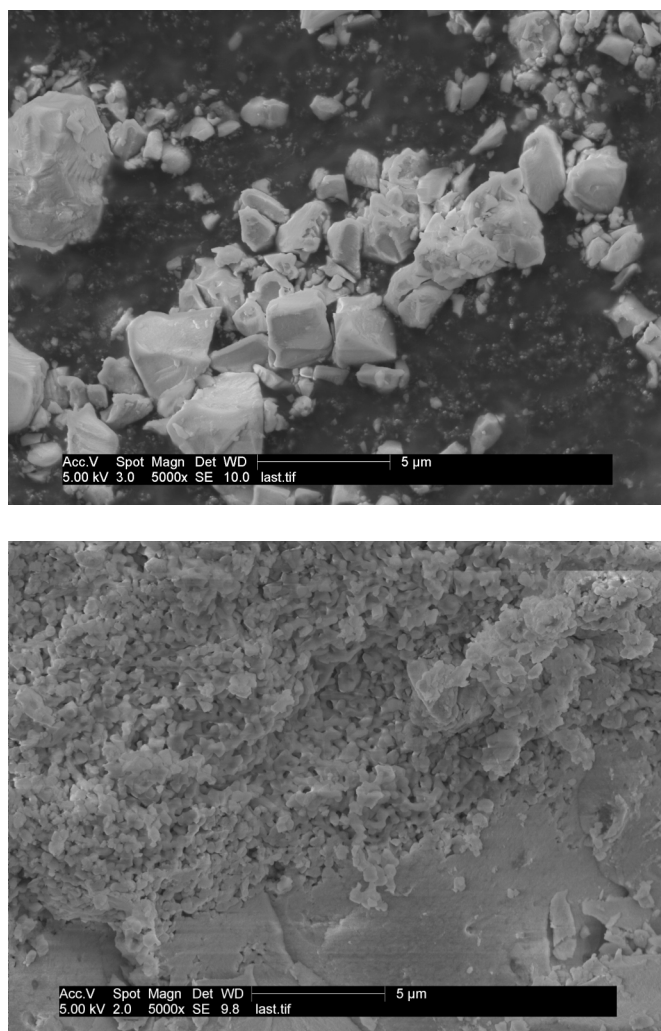

**SI Figure 5** Optical and fluorescence images of solid (top) and hollow (bottom) spheres

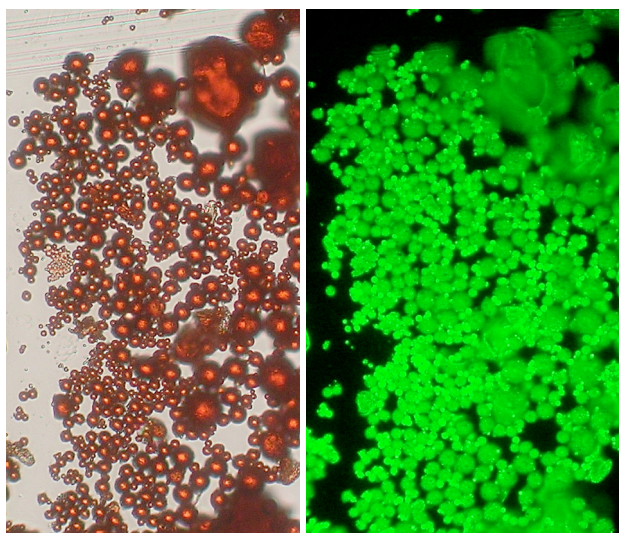

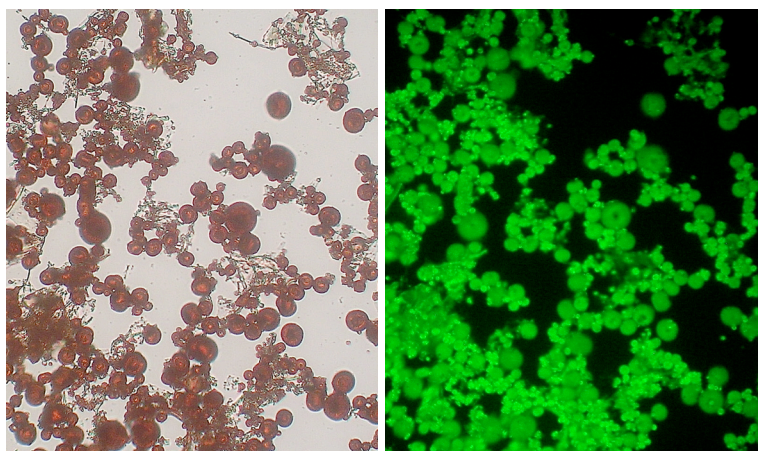

**SI Table 1** Stir rate affect on sphere size. The values are the average percent of spheres that have that given size.

| Stir rate<br>(RPM) | Sphere Size ( $\mu\text{m}$ ) |      |       |       |       |       |       |       |     |
|--------------------|-------------------------------|------|-------|-------|-------|-------|-------|-------|-----|
|                    | 1-5                           | 6-10 | 11-15 | 16-20 | 21-25 | 26-30 | 31-40 | 41-50 | >50 |
| 380                | 67                            | 15   | 1     | 4     | 1     | 4     | 3     | 1     | 4   |
| 550                | 52                            | 26   | 11    | 3     | 3     | 1     | 2     | 2     |     |
| 870                | 66                            | 22   | 10    | 2     |       |       |       |       |     |
| 1100               | 85                            | 12   | 3     |       |       |       |       |       |     |

**SI Table 2** Nanoparticle concentration affect on sphere size. The values are the average percent of spheres that have the given size.

| Concentration<br>(%) | Sphere Size ( $\mu\text{m}$ ) |      |       |       |       |       |       |
|----------------------|-------------------------------|------|-------|-------|-------|-------|-------|
|                      | 1-5                           | 6-10 | 11-15 | 16-20 | 21-25 | 26-30 | 31-40 |
| 2.9                  | 72                            | 15   | 5     | 4     | 3     | 2     | 1     |
| 0.27                 | 56                            | 28   | 9     | 5     | 2     |       |       |
| 0.017                | 57                            | 39   | 4     |       |       |       |       |
| 0.0023               | 68                            | 32   |       |       |       |       |       |
